# Supplementary material for: Synthesis and Biological Evaluation of Zeise’s Salt Derivatives with Acetylsalicylic Acid Substructure
Source: PubMed Central journal article supplement (PMC6032411; doi:10.3390/ijms19061612), 2018-05-30
Supplement: ijms-19-01612-s001.pdf [file ijms-19-01612-s001.pdf]

# Synthesis and Biological Evaluation of Zeise's Salt Derivatives with Acetylsalicylic Acid Substructure

Alexander Weninger<sup>1</sup>, Daniel Baecker<sup>1</sup>, Victoria Obermoser<sup>1</sup>, Dorothea Egger<sup>1</sup>, Klaus Wurst<sup>2</sup> and Ronald Gust<sup>1,\*</sup>

1 Department of Pharmaceutical Chemistry, Institute of Pharmacy, Center for Molecular Biosciences Innsbruck, University of Innsbruck, CCB – Centrum for Chemistry and Biomedicine, Innrain 80-82, 6020 Innsbruck, Austria; alexander.weninger@uibk.ac.at (A.W.); daniel.baecker@uibk.ac.at (D.B.); victoria.obermoser@gmx.at (V.O.); dorothea.egger@gmx.at (D.E.); ronald.gust@uibk.ac.at (R.G.)

2 Institute of General, Inorganic and Theoretical Chemistry, University of Innsbruck, CCB – Centrum for Chemistry and Biomedicine, Innrain 80-82, 6020 Innsbruck, Austria; klaus.wurst@uibk.ac.at (K.W.)

\* Correspondence: ronald.gust@uibk.ac.at; Tel.: +43-512-507-58200

## 1. HR-ESI-MS

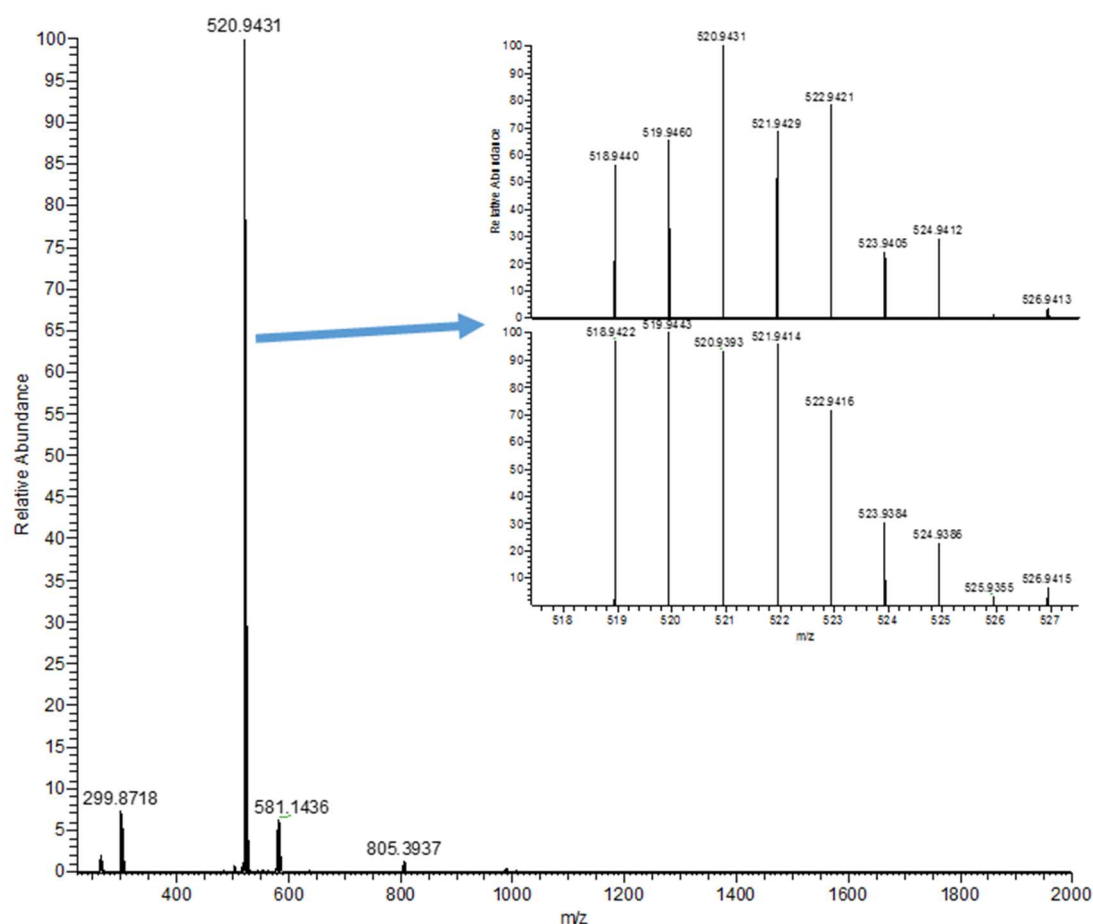

**Figure S1.** HR-ESI-MS spectrum of Pt-Propene-ASA (**1a**), recorded in negative mode; The inset shows the peak of [**1a**-K] with the characteristic line pattern of the platinum isotopes (top) and the calculated peak (bottom)

## 2. 1D and 2D NMR spectra

### 2.1 Propene-ASA (1)

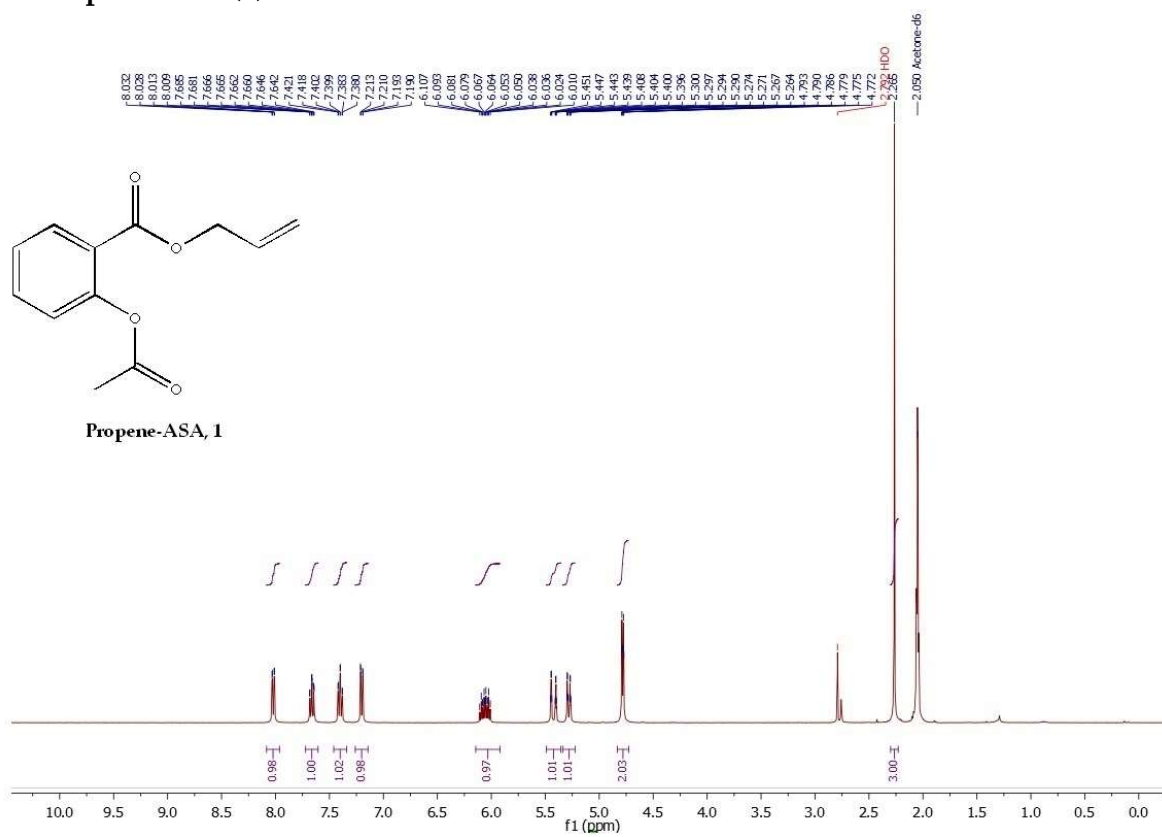

**Figure S2.**  $^1\text{H}$  NMR of Propene-ASA (1) in Acetone- $d_6$

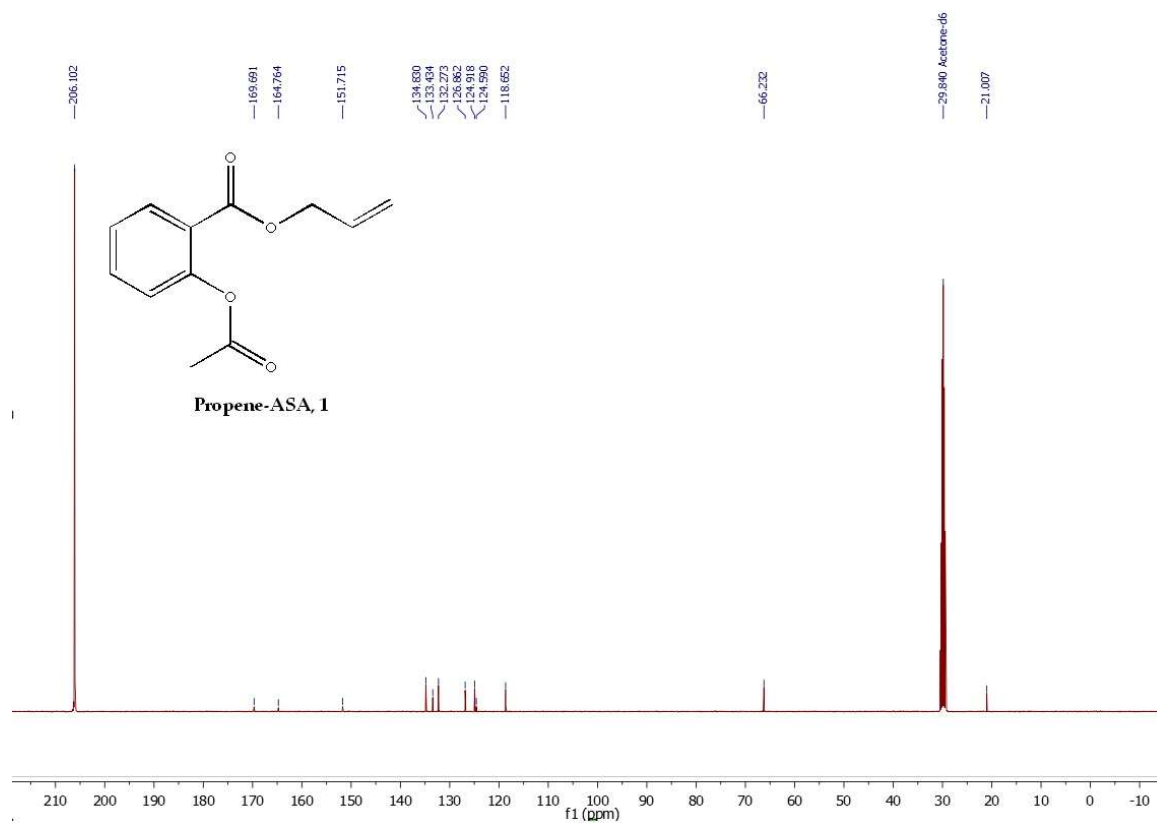

**Figure S3.**  $^{13}\text{C}$  NMR of Propene-ASA (1) in Acetone- $d_6$

## 2.2 Pt-Propene-ASA (1a)

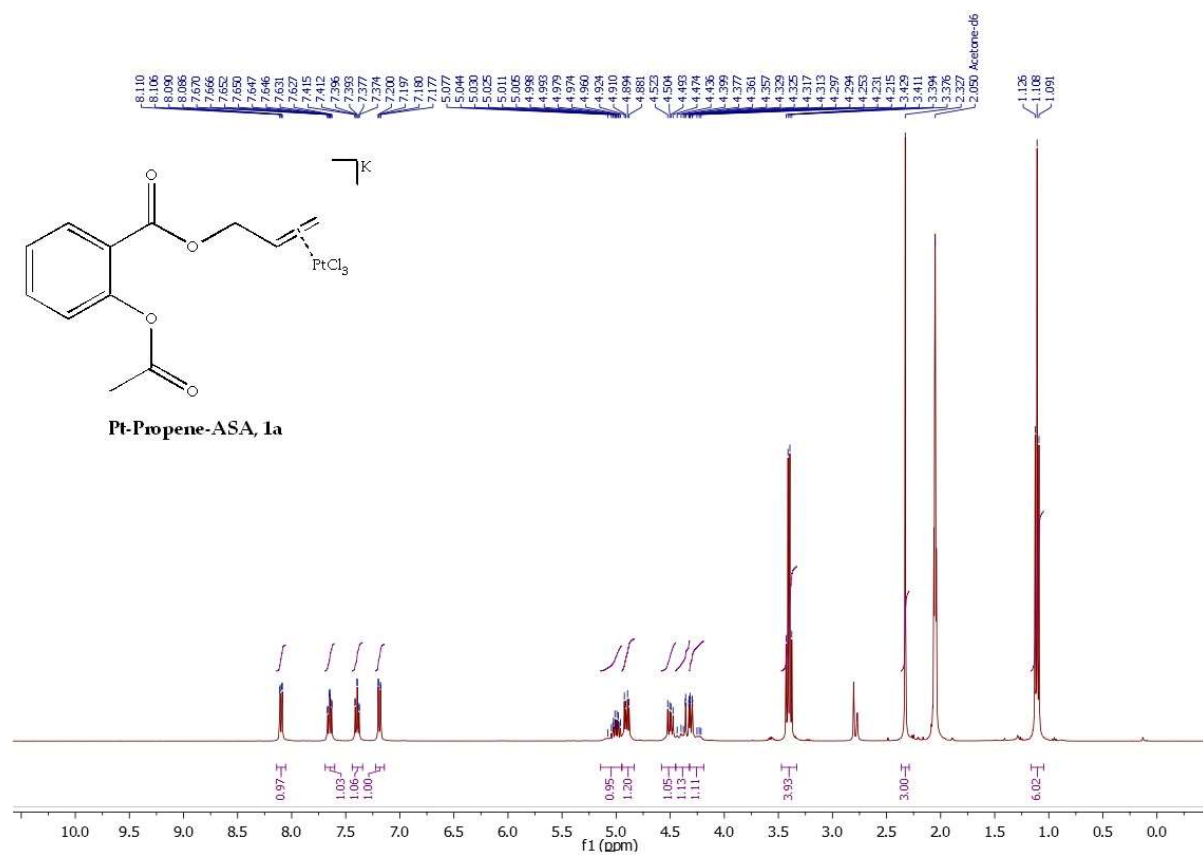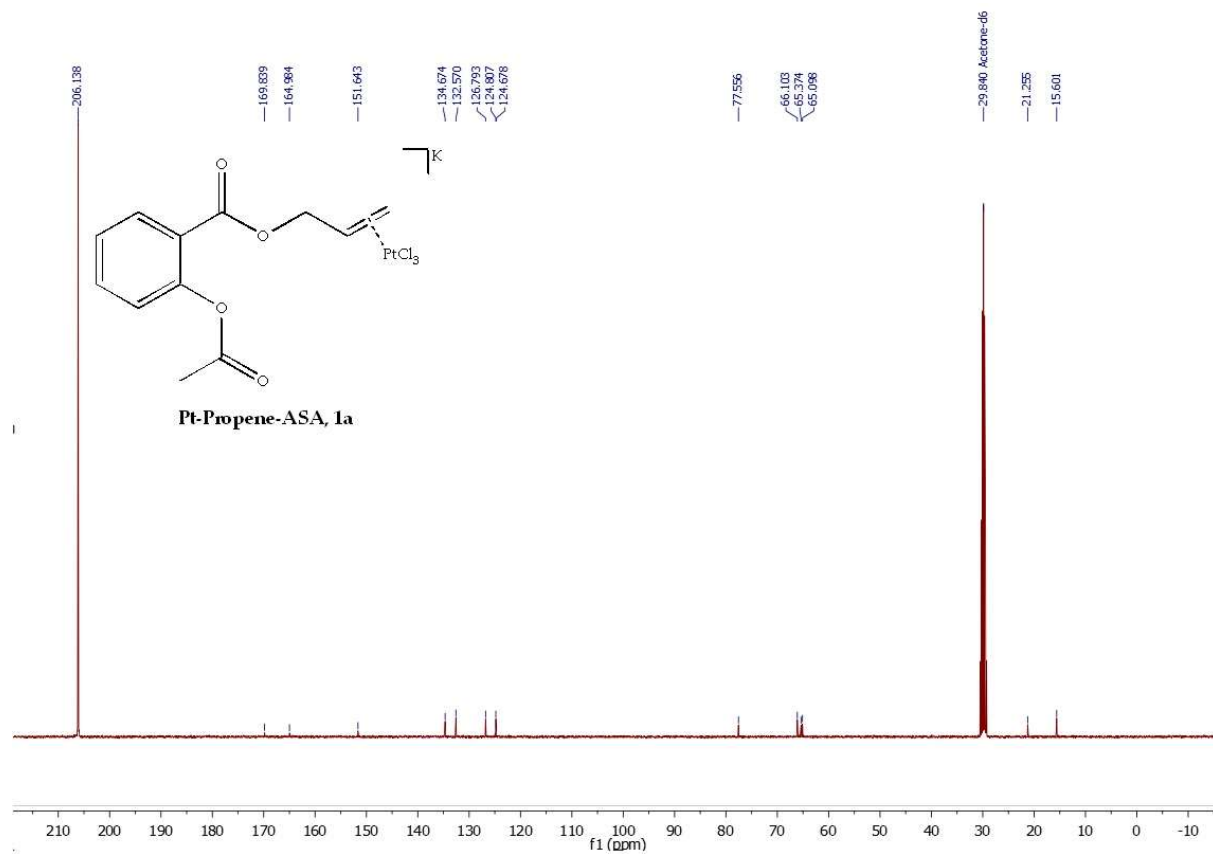

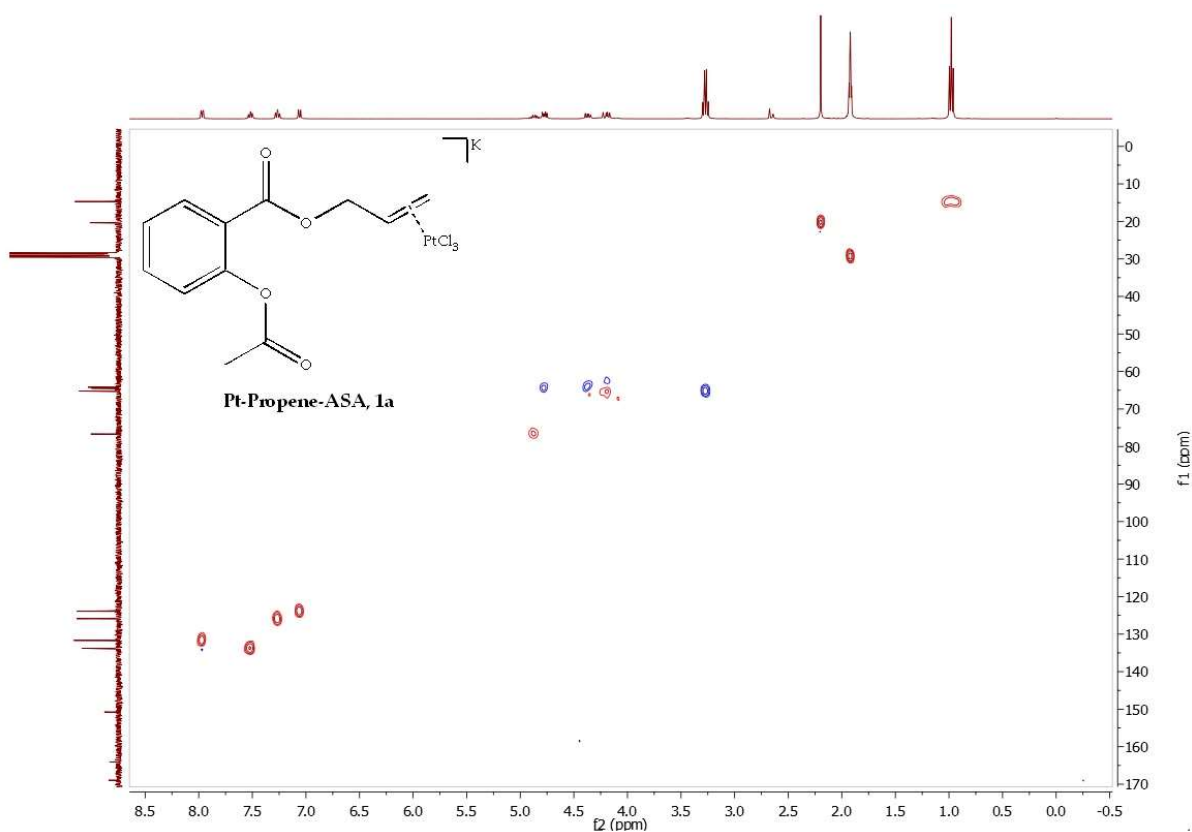

Figure S6.  $[^1\text{H}, ^{13}\text{C}]$ -HSQC of Pt-Propene-ASA (1a) in Acetone- $d_6$

### 2.3 Butene-ASA (2)

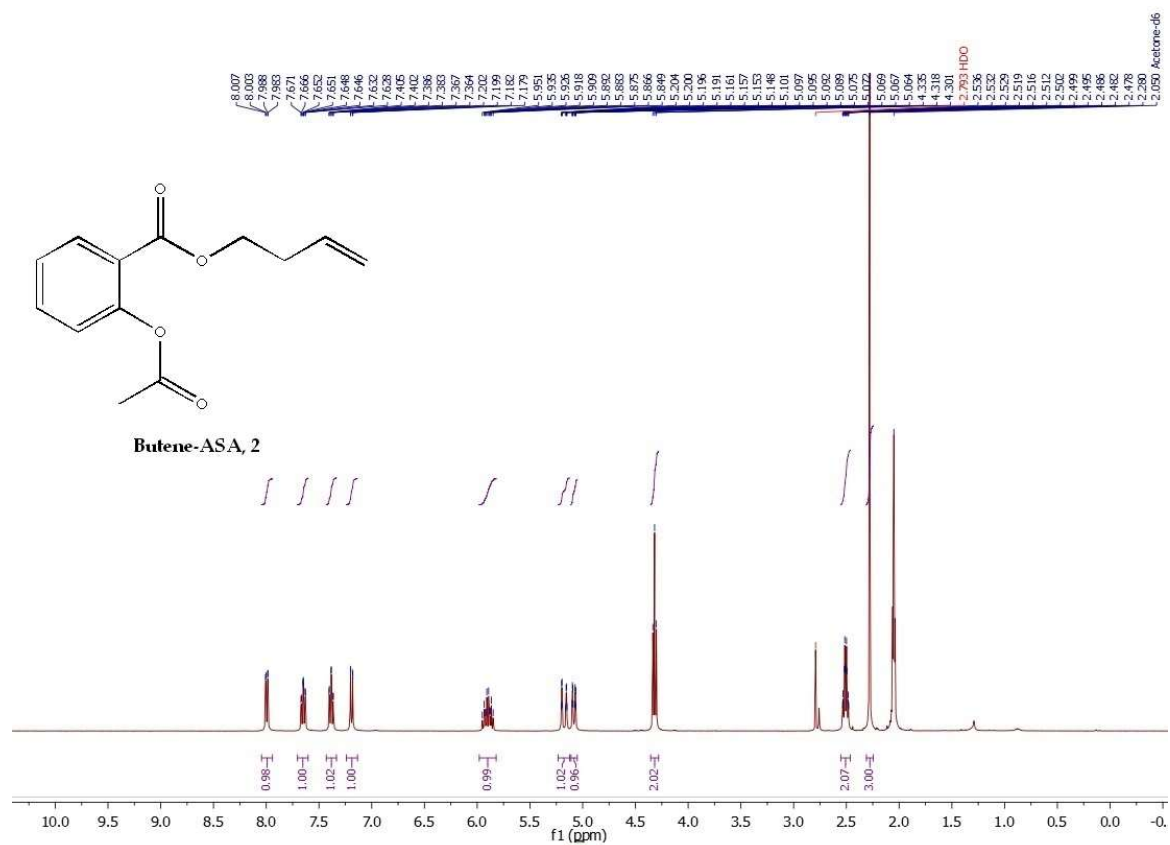

Figure S7.  $^1\text{H}$  NMR of Butene-ASA (2) in Acetone- $d_6$

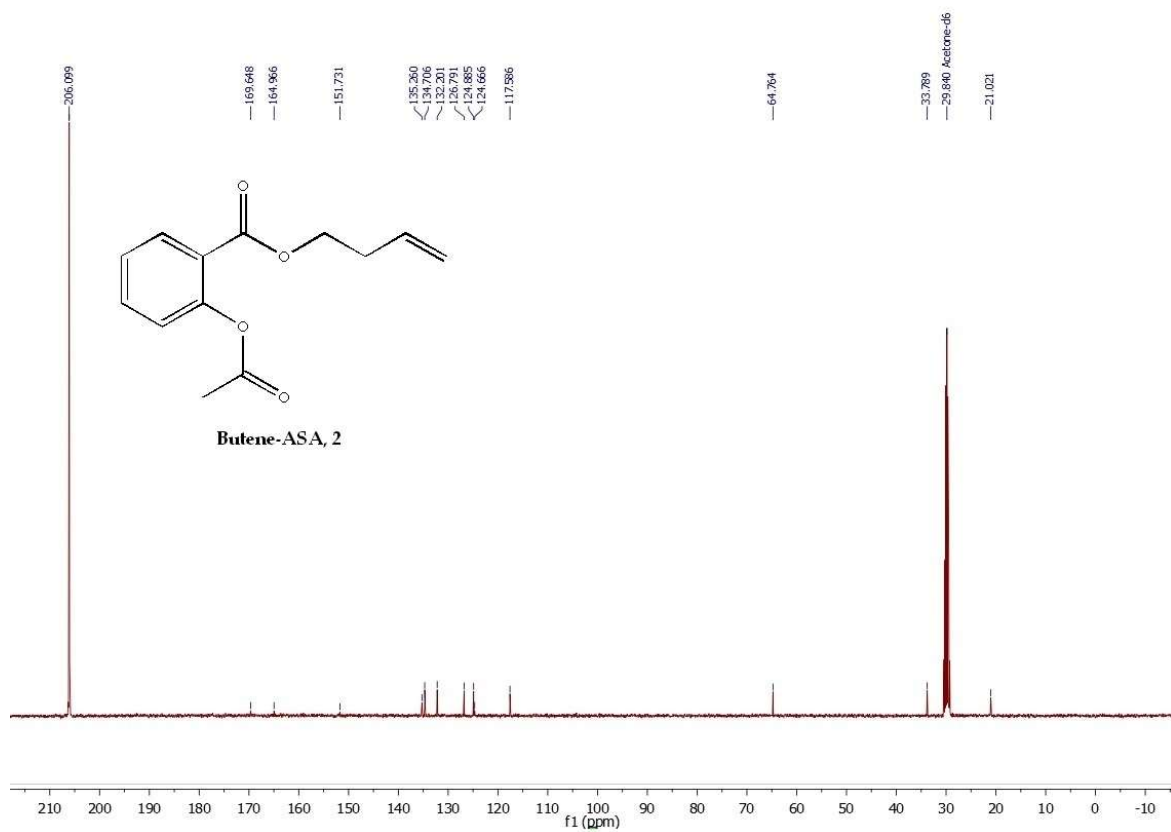

Figure S8. <sup>13</sup>C NMR of Butene-ASA (2) in Acetone-d<sub>6</sub>

## 2.4 Pt-Butene-ASA (2a)

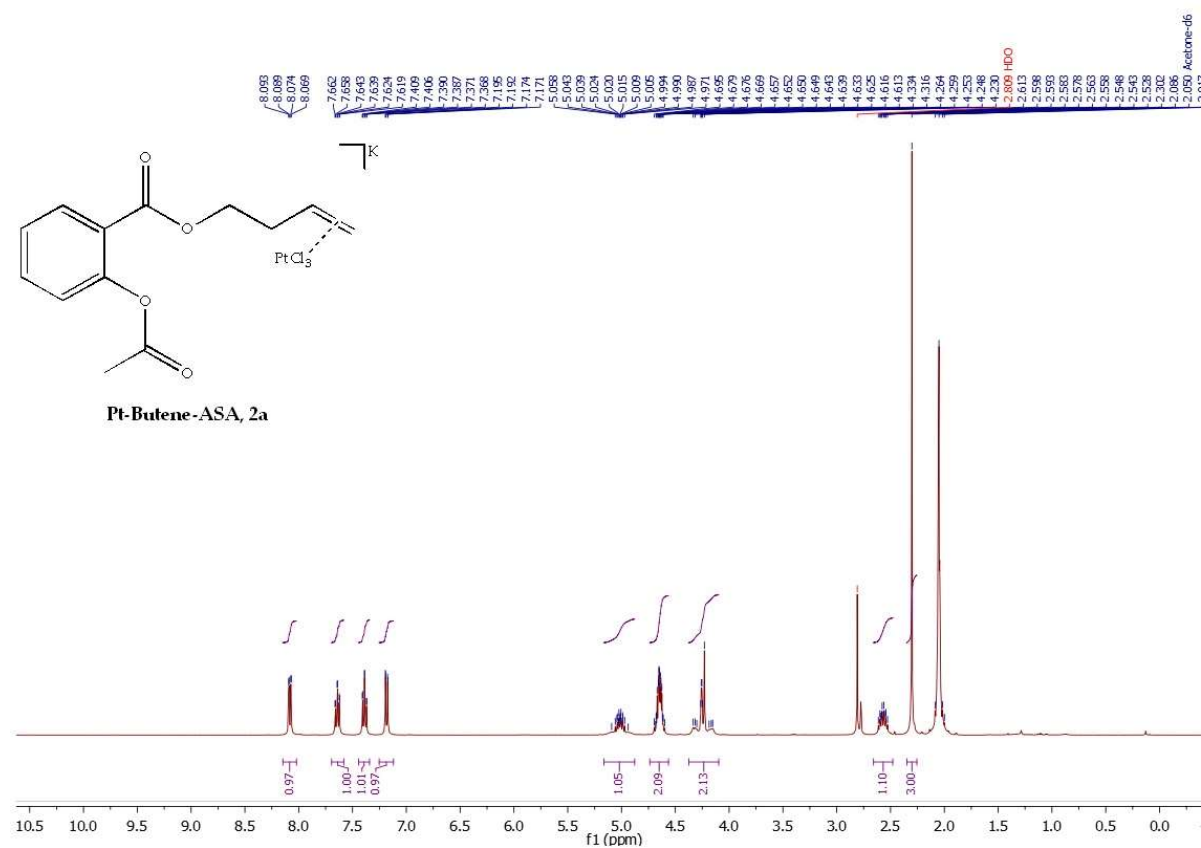

Figure S9. <sup>1</sup>H NMR of Pt-Butene-ASA (2a) in Acetone-d<sub>6</sub>

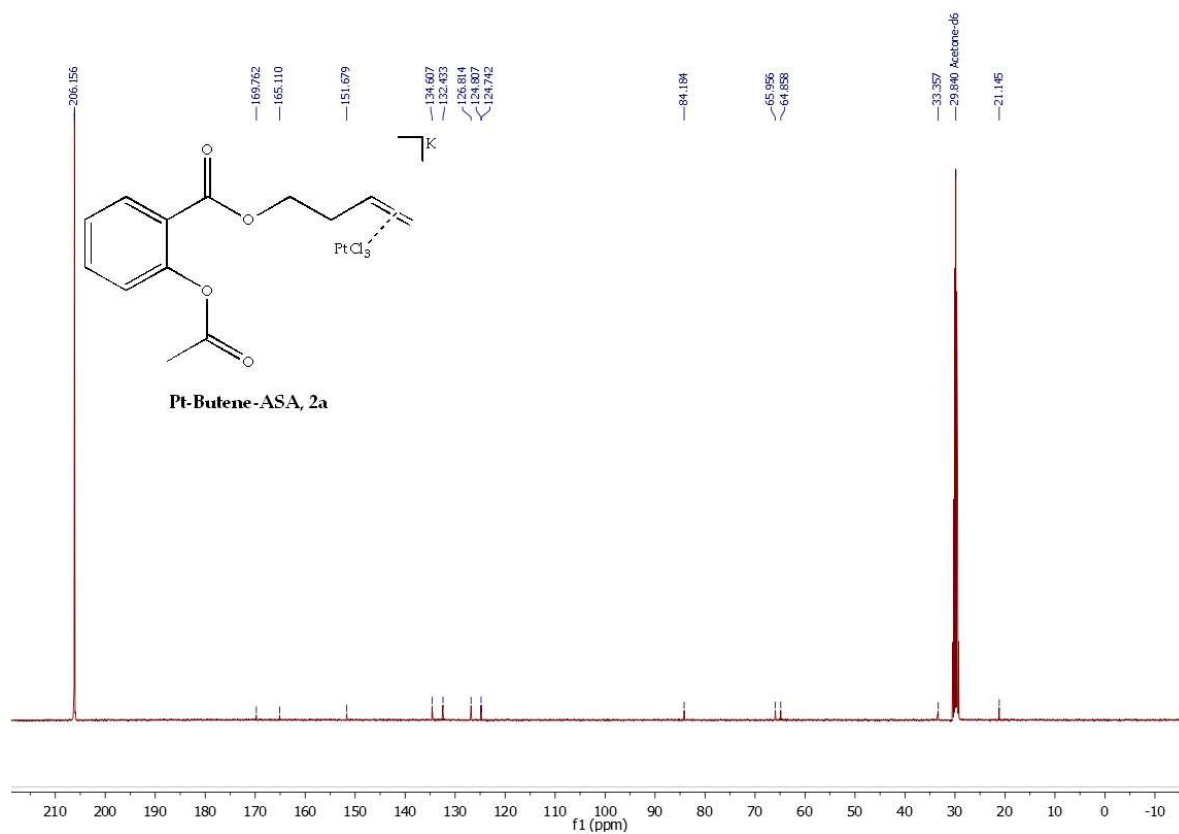

**Figure S10.**  $^{13}\text{C}$  NMR of Pt-Butene-ASA (**2a**) in Acetone- $d_6$

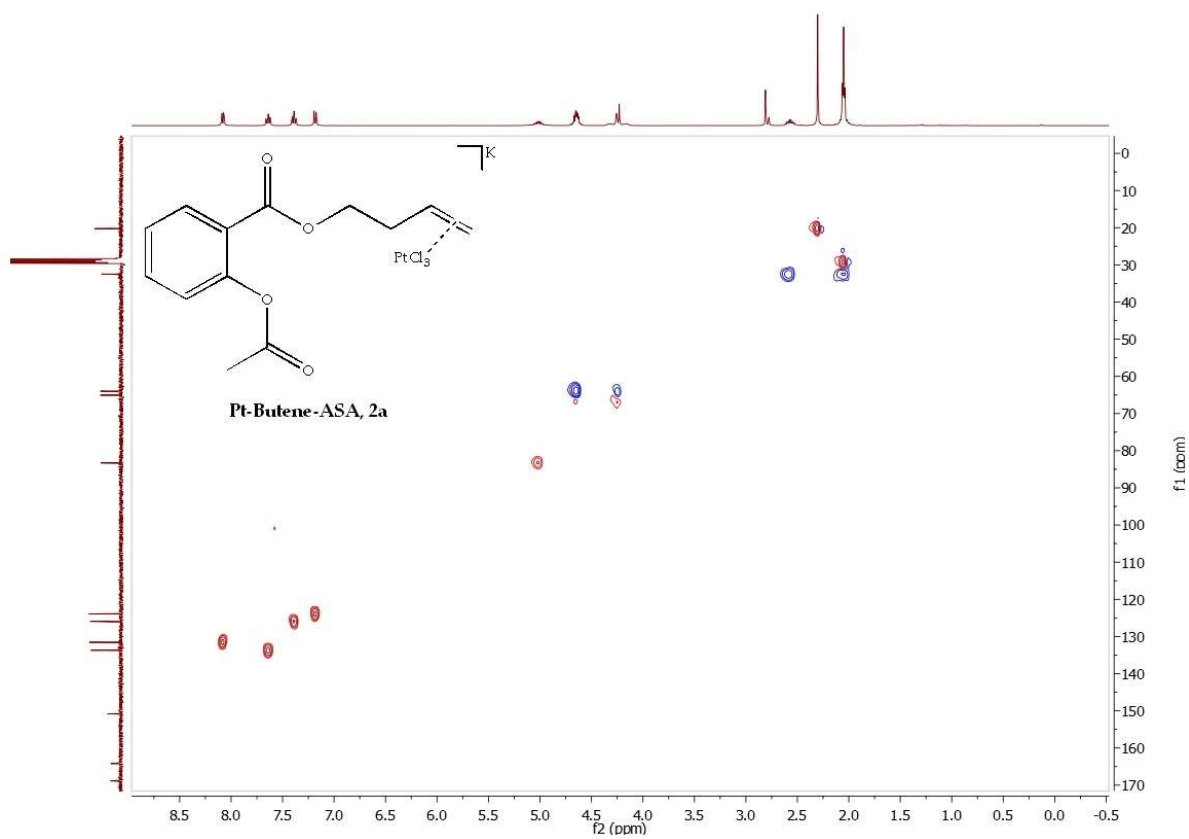

**Figure S11.**  $^1\text{H}$ ,  $^{13}\text{C}$ -HSQC of Pt-Butene-ASA (**2a**) in Acetone- $d_6$

## 2.5 Pentene-ASA (3)

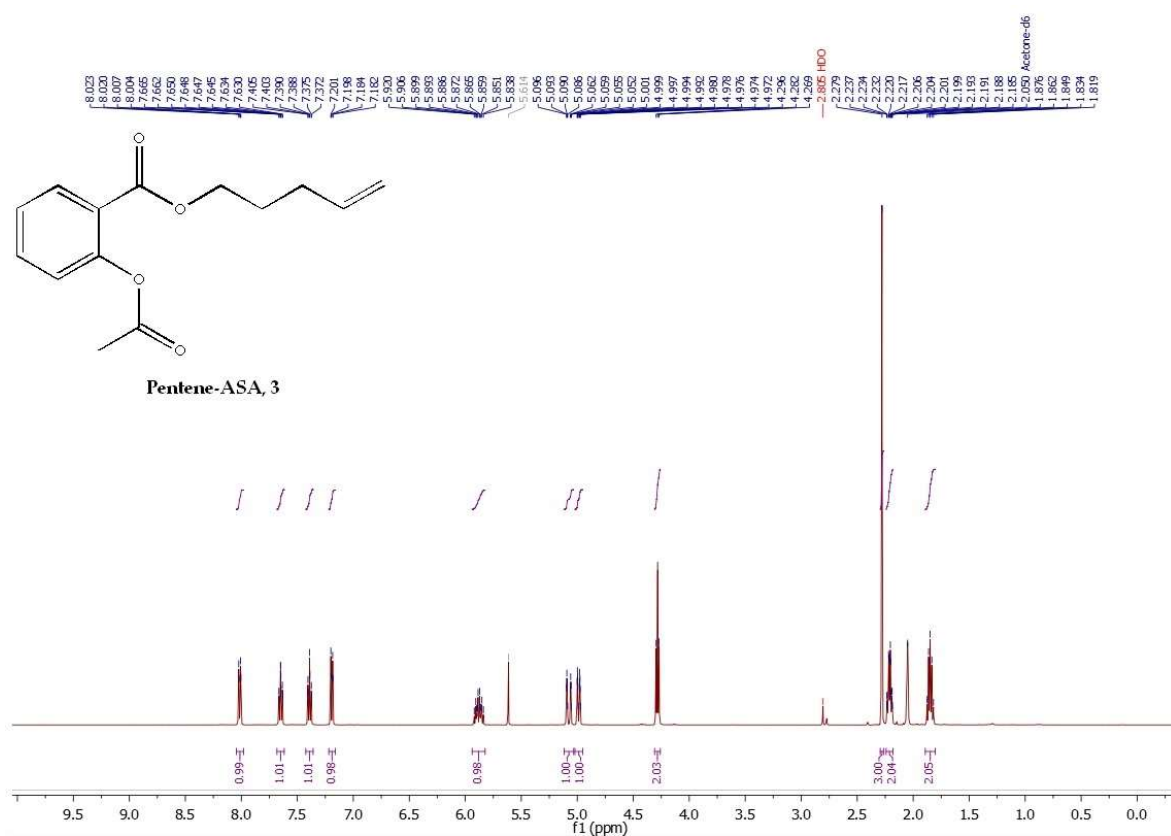

Figure S12. <sup>1</sup>H NMR of Pentene-ASA (3) in Acetone-*d*<sub>6</sub>

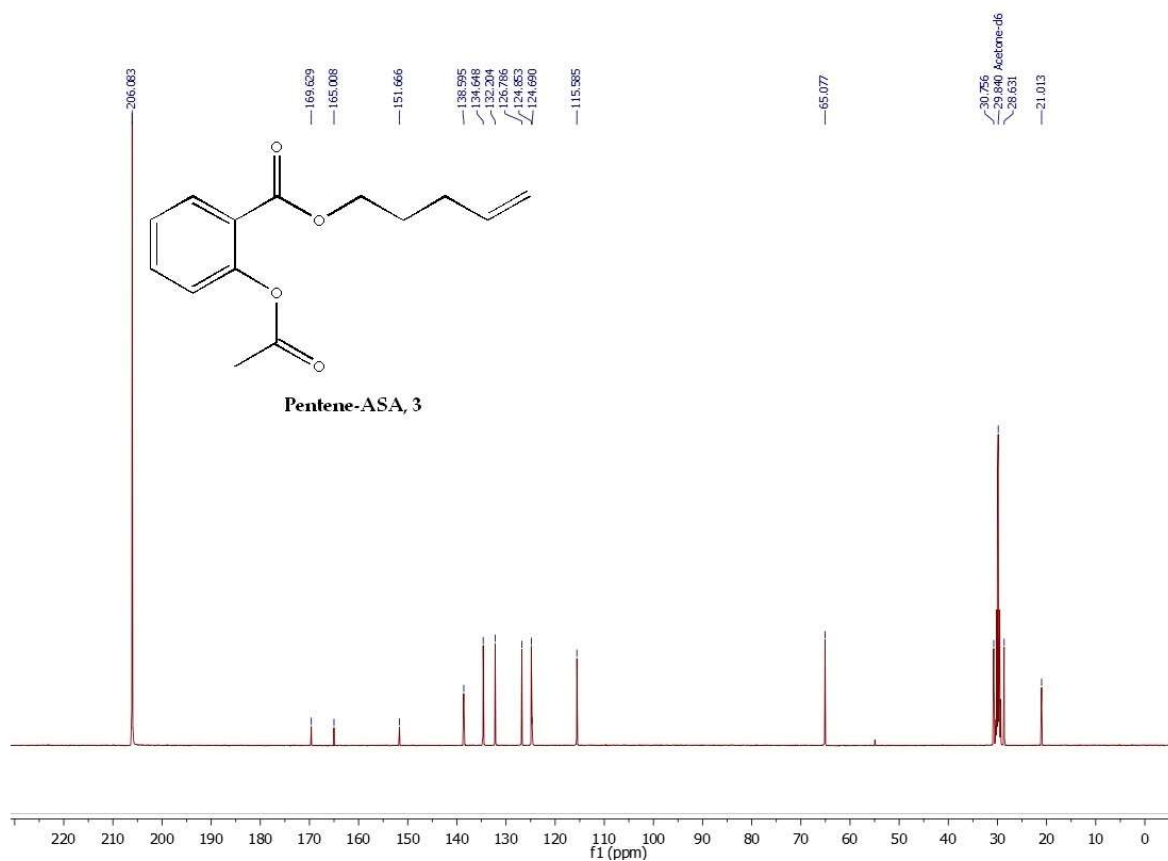

Figure S13. <sup>13</sup>C NMR of Pentene-ASA (3) in Acetone-*d*<sub>6</sub>

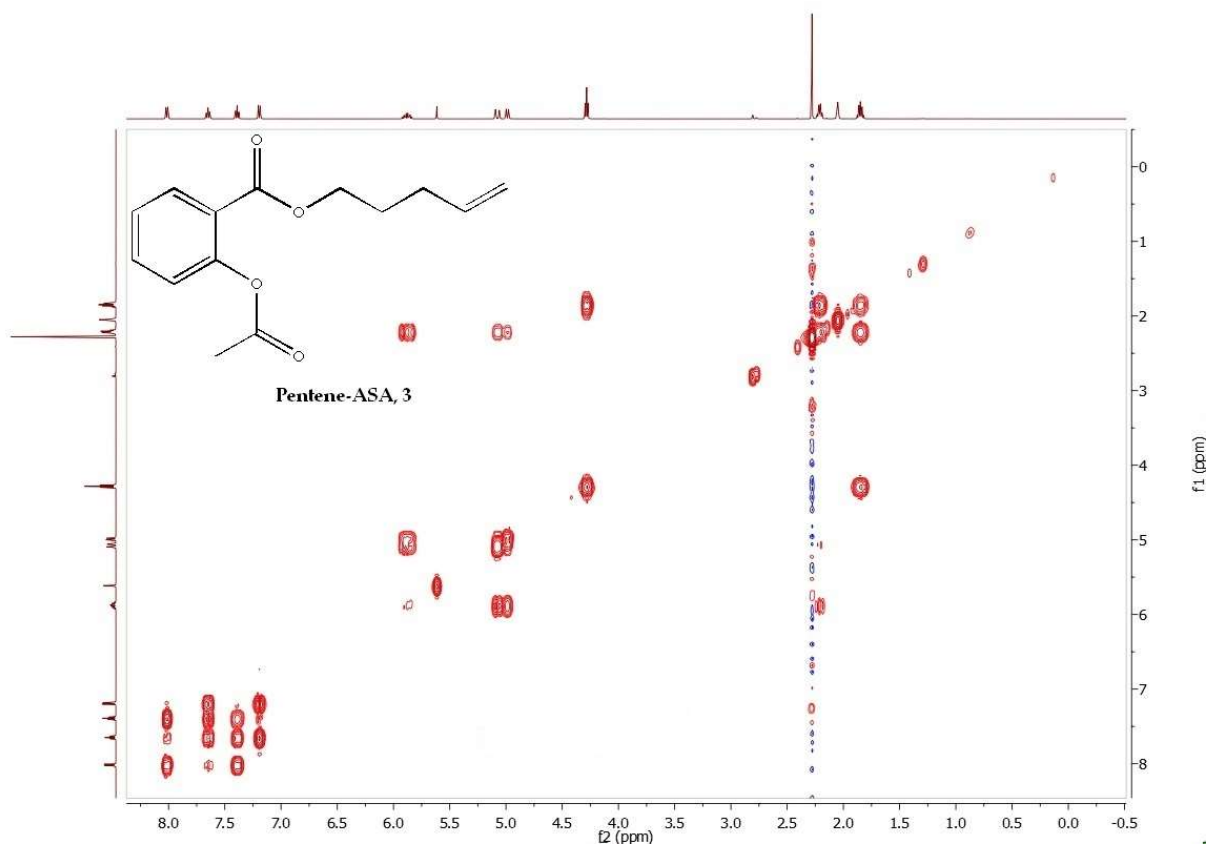

Figure S14.  $[^1\text{H},^1\text{H}]$ -COSY of Pentene-ASA (3) in Acetone- $d_6$

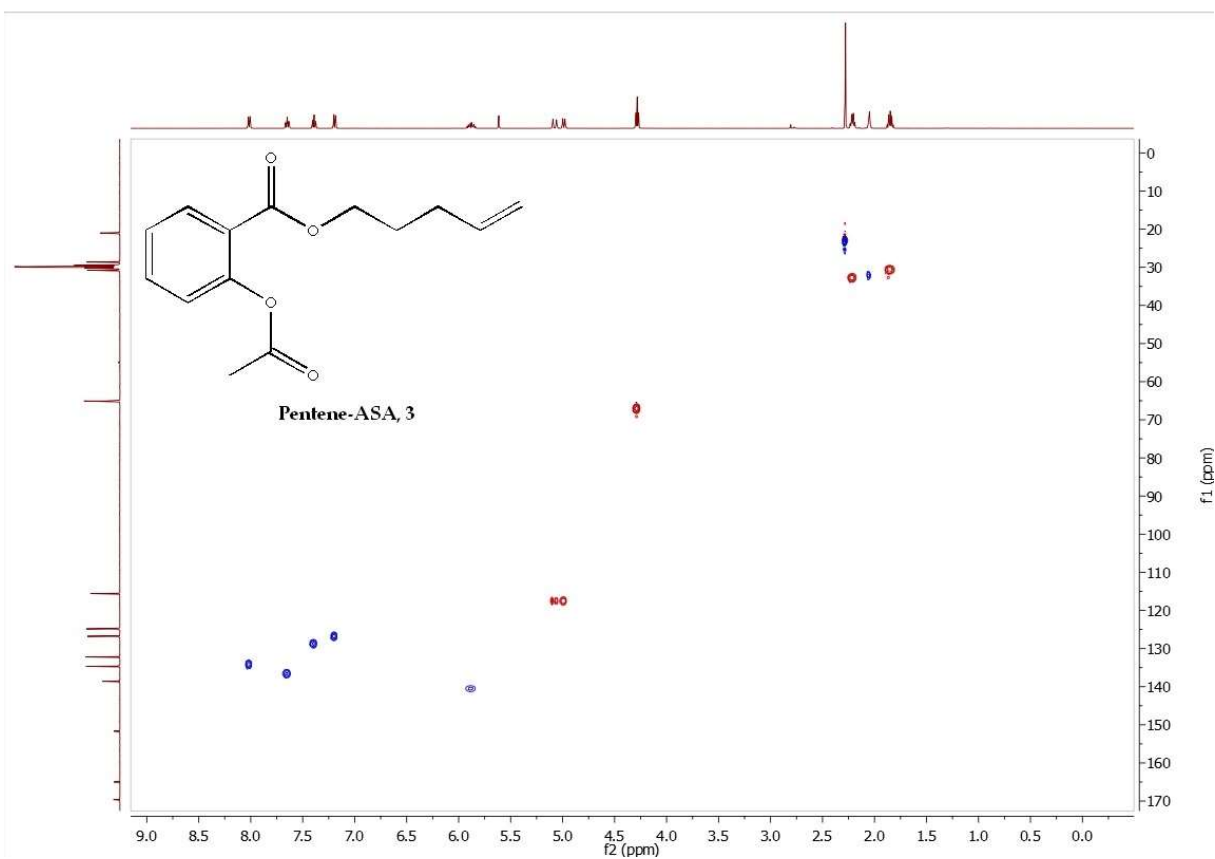

Figure S15.  $[^1\text{H},^{13}\text{C}]$ -HSQC of Pentene-ASA (3) in Acetone- $d_6$



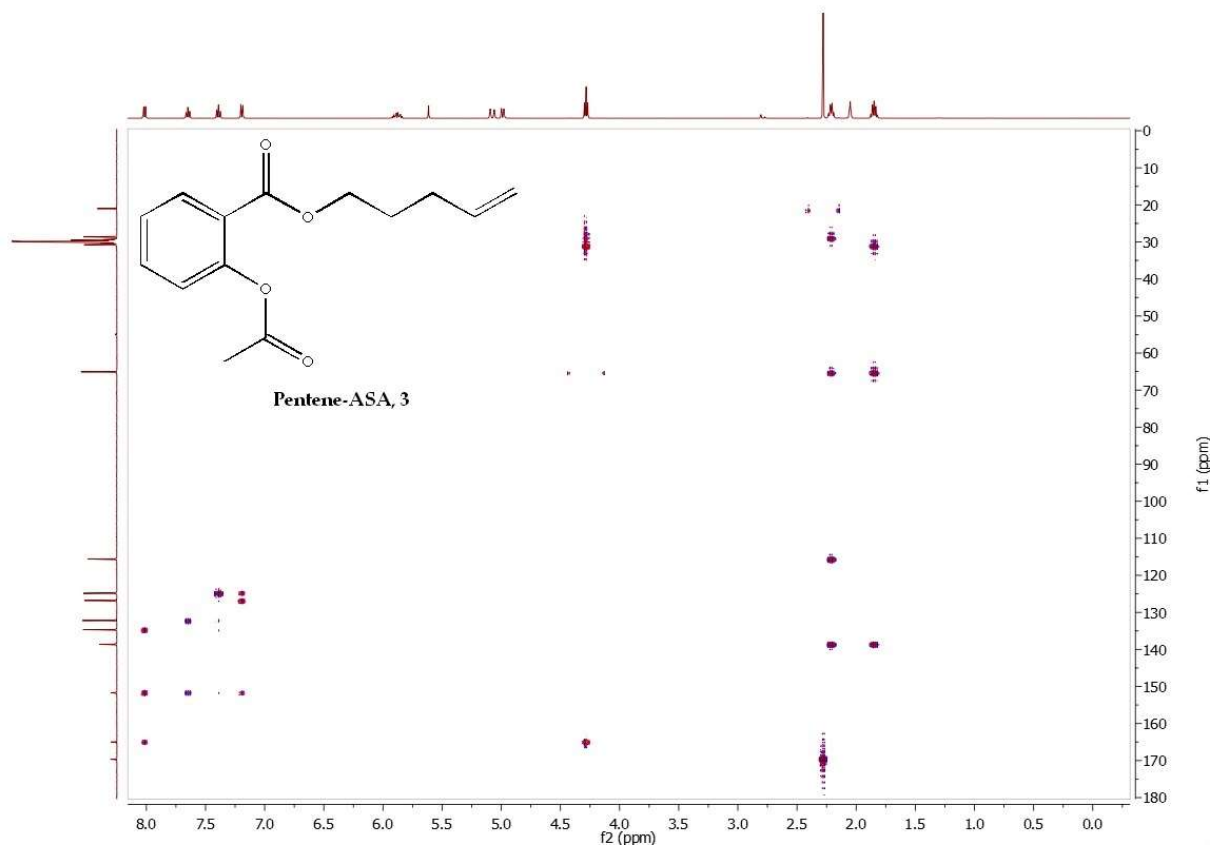

Figure S16.  $^1\text{H},^{13}\text{C}$ -HMBC of Pentene-ASA (3) in Acetone- $d_6$

## 2.6 Pt-Pentene-ASA (3a)

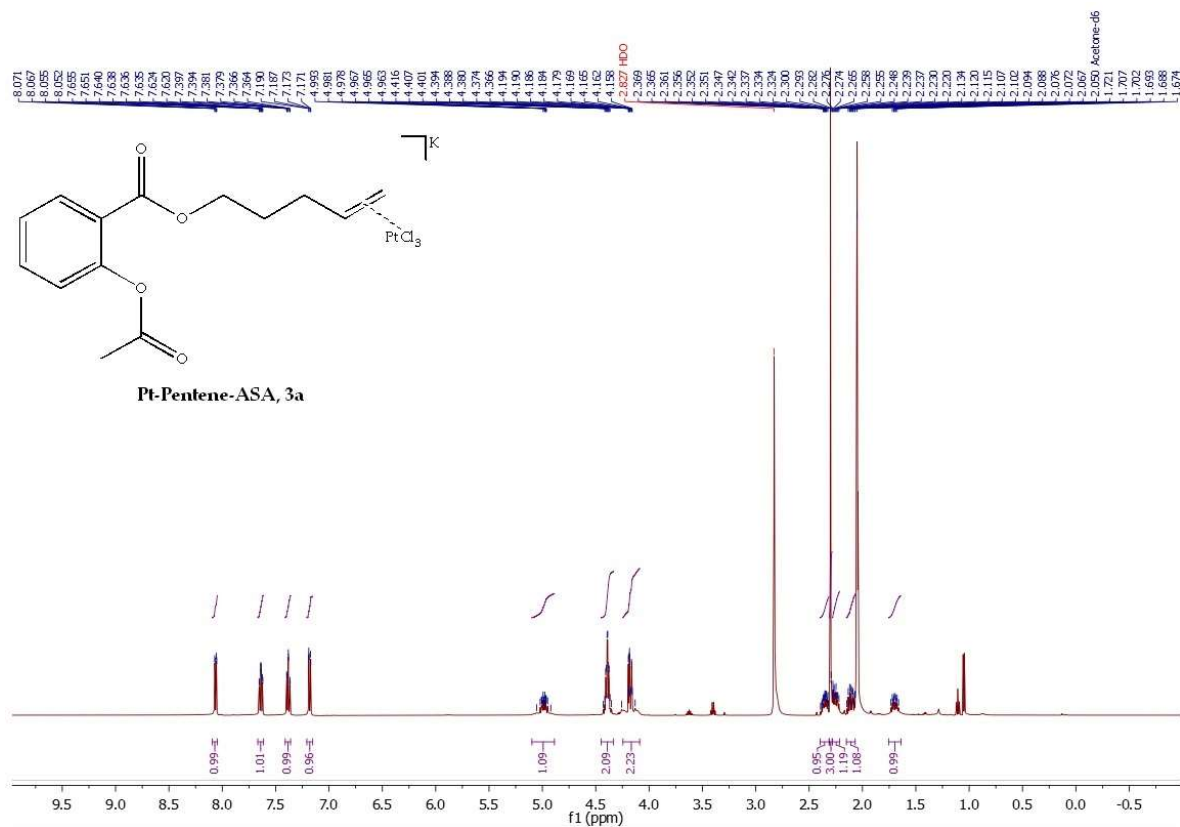

Figure S17.  $^1\text{H}$  NMR of Pt-Pentene-ASA (3a) in Acetone- $d_6$

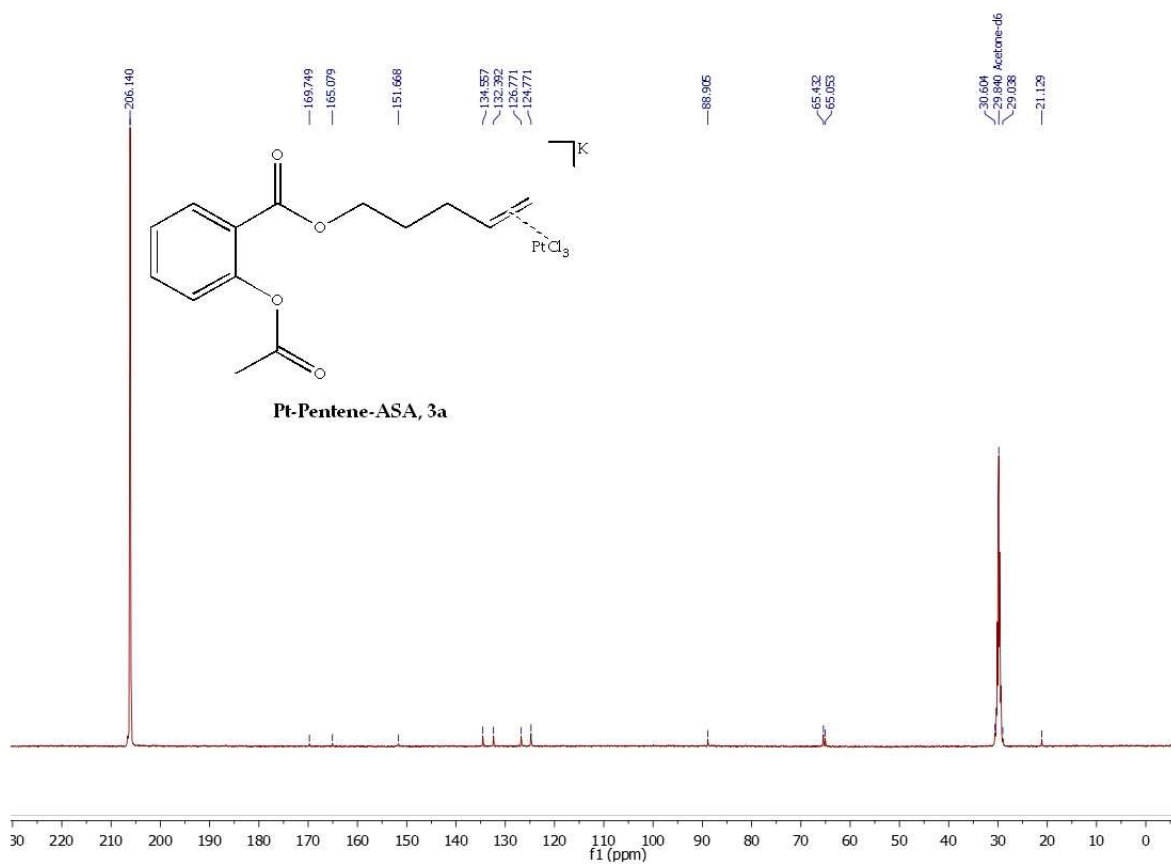

**Figure S18.** <sup>13</sup>C NMR of Pt-Pentene-ASA (3a) in Acetone-*d*<sub>6</sub>

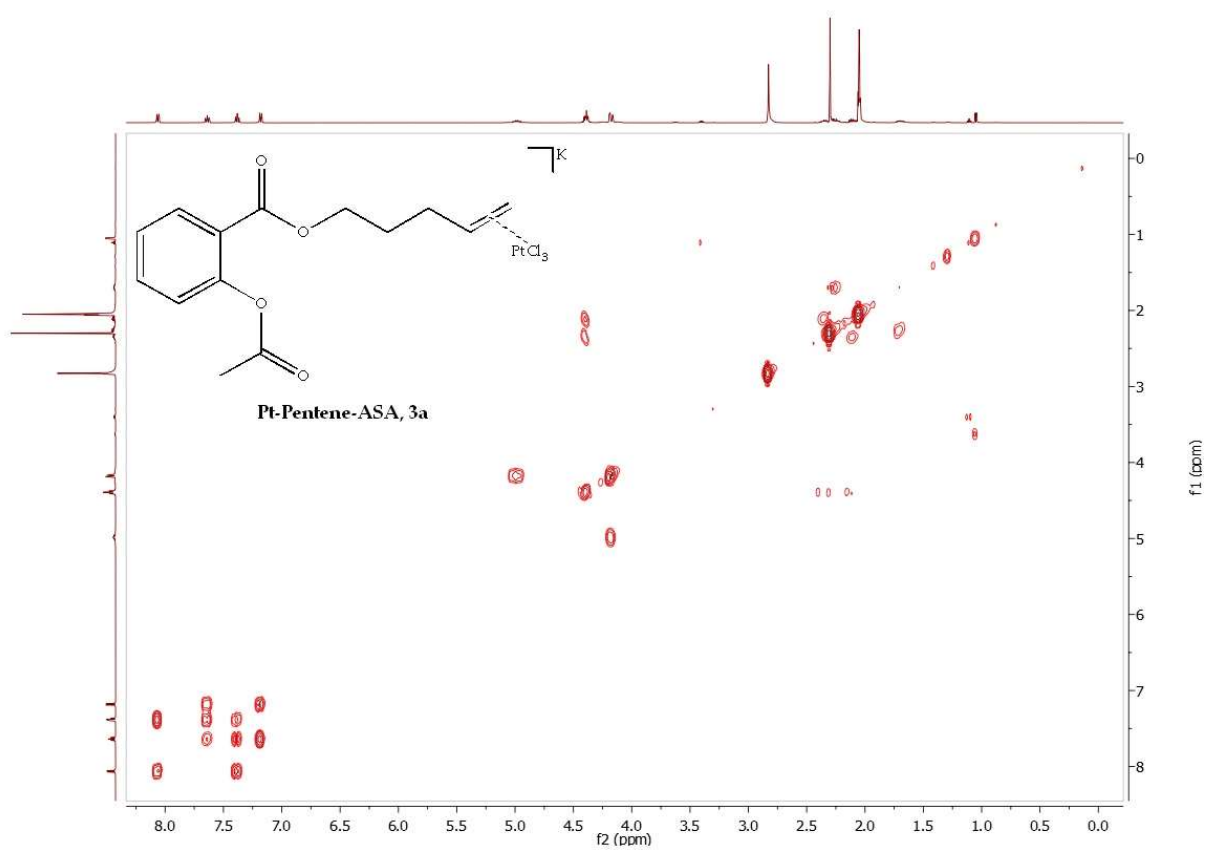

**Figure S19.** [<sup>1</sup>H, <sup>1</sup>H]-COSY of Pt-Pentene-ASA (3a) in Acetone-*d*<sub>6</sub>

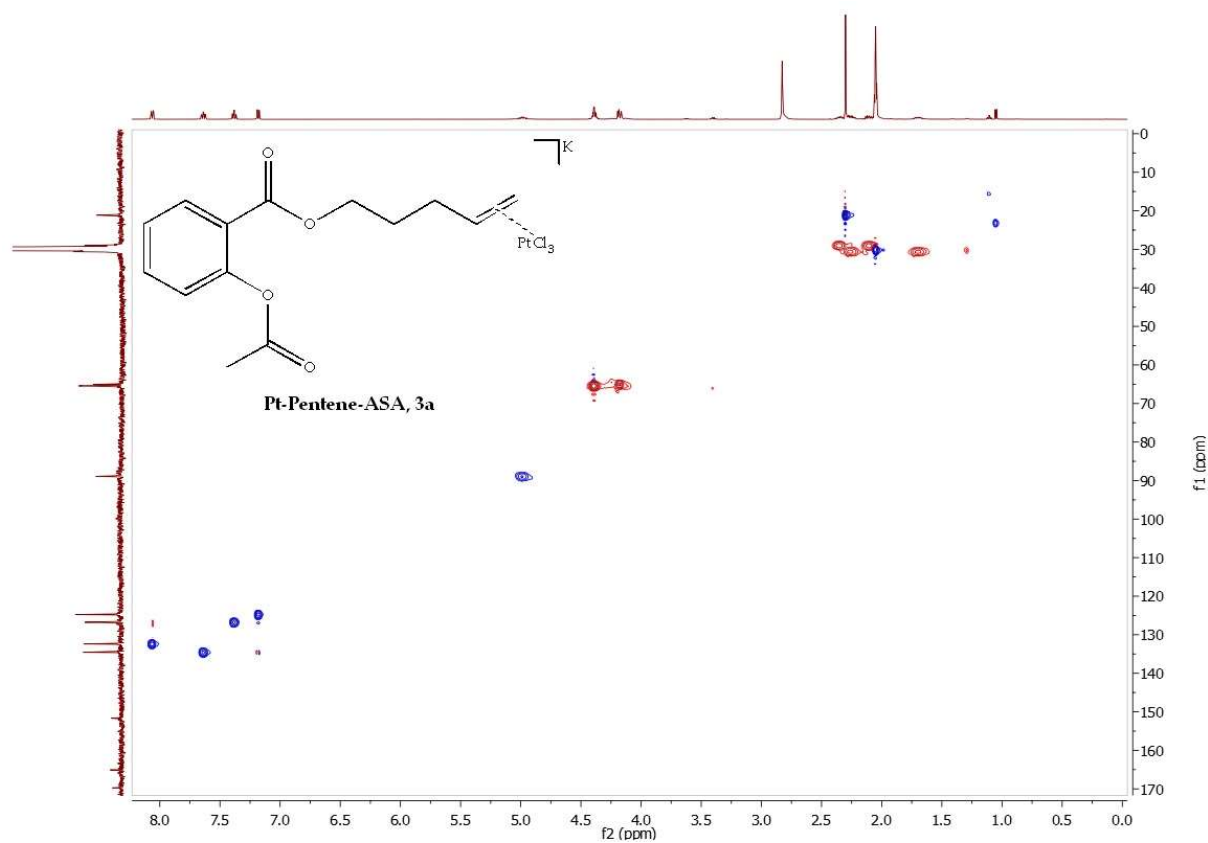

Figure S20.  $[^1\text{H},^{13}\text{C}]$ -HSQC of Pt-Pentene-ASA (3a) in Acetone- $d_6$

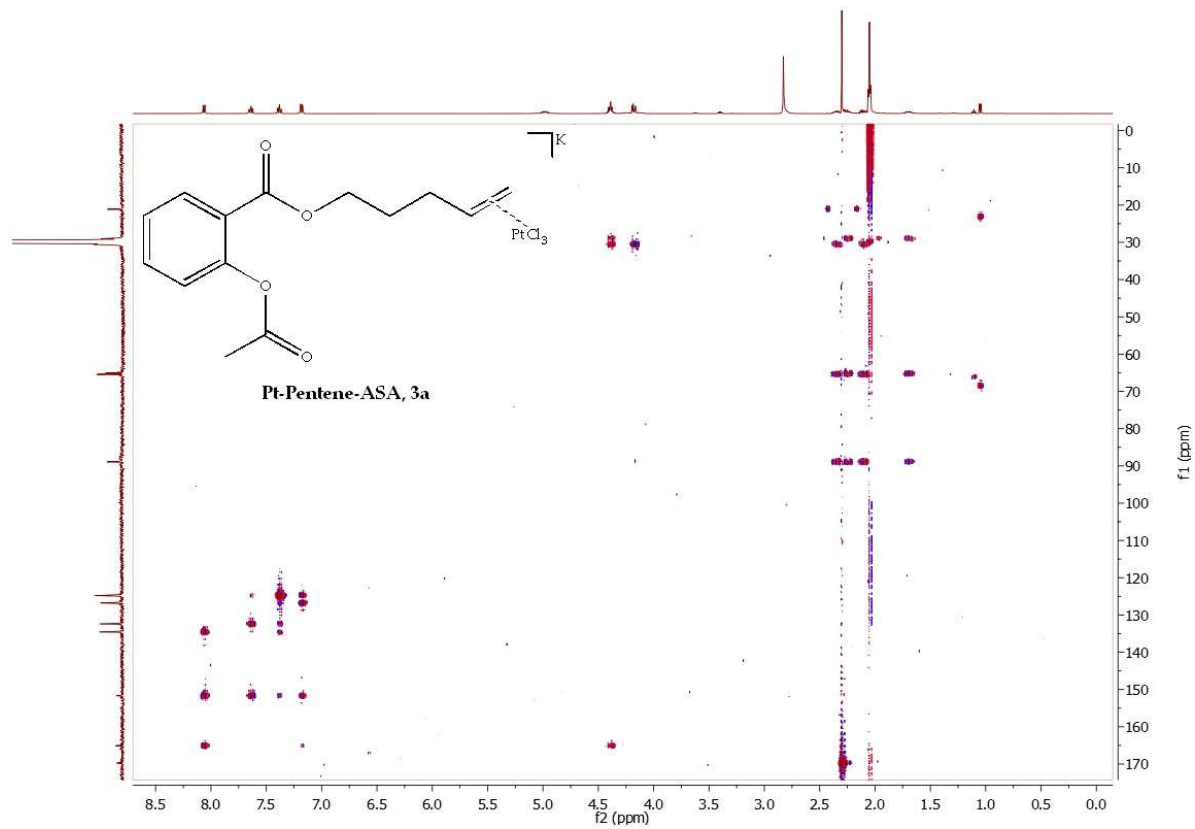

Figure S21.  $[^1\text{H},^{13}\text{C}]$ -HMBC of Pt-Pentene-ASA (3a) in Acetone- $d_6$

## 2.7 Hexene-ASA (4)

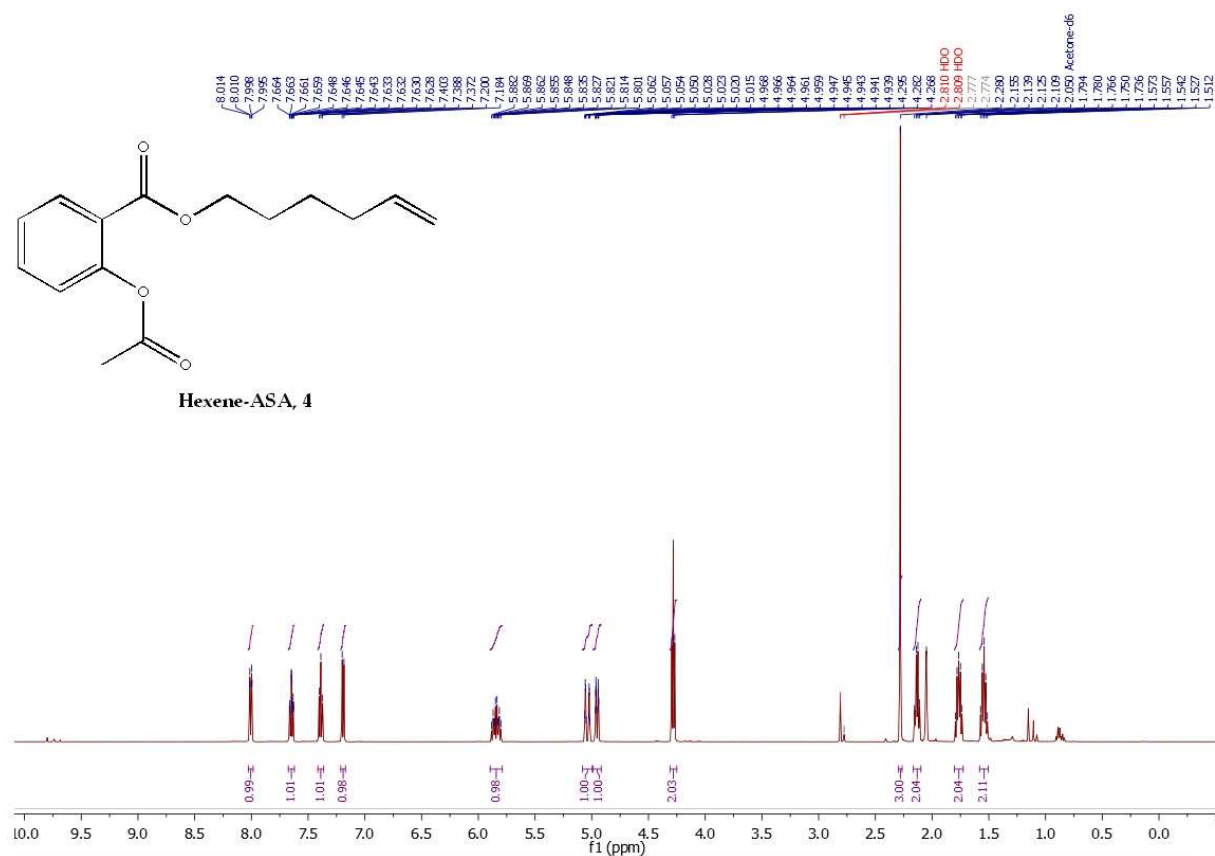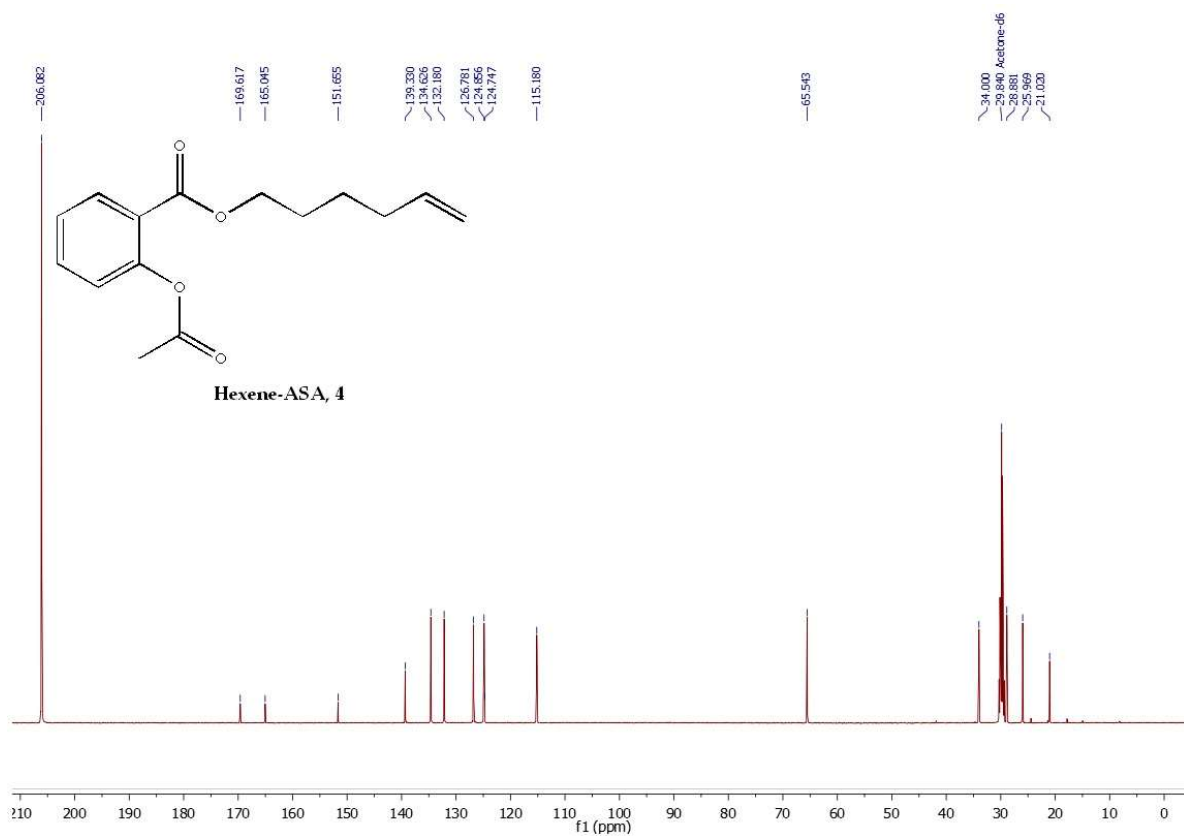

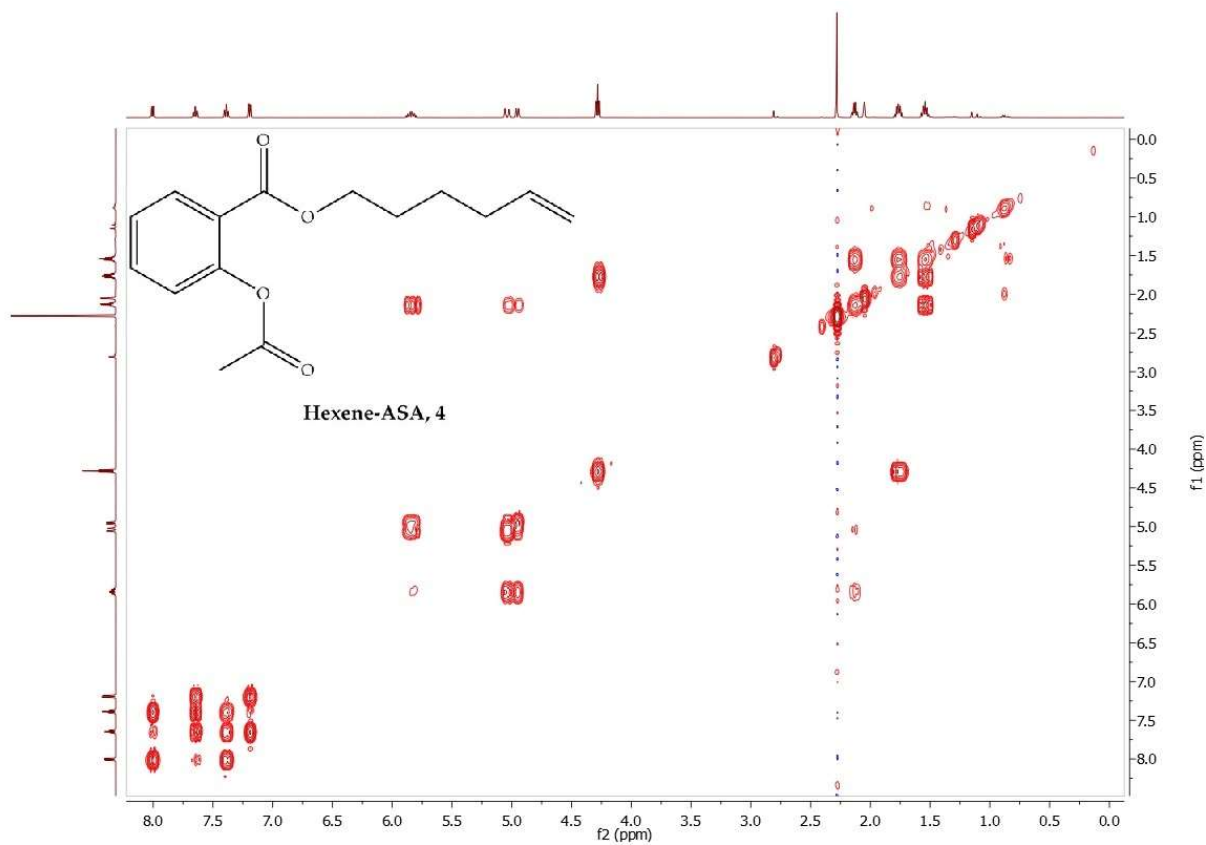

Figure S24.  $[^1\text{H}, ^1\text{H}]$ -COSY of Hexene-ASA (4) in Acetone- $d_6$

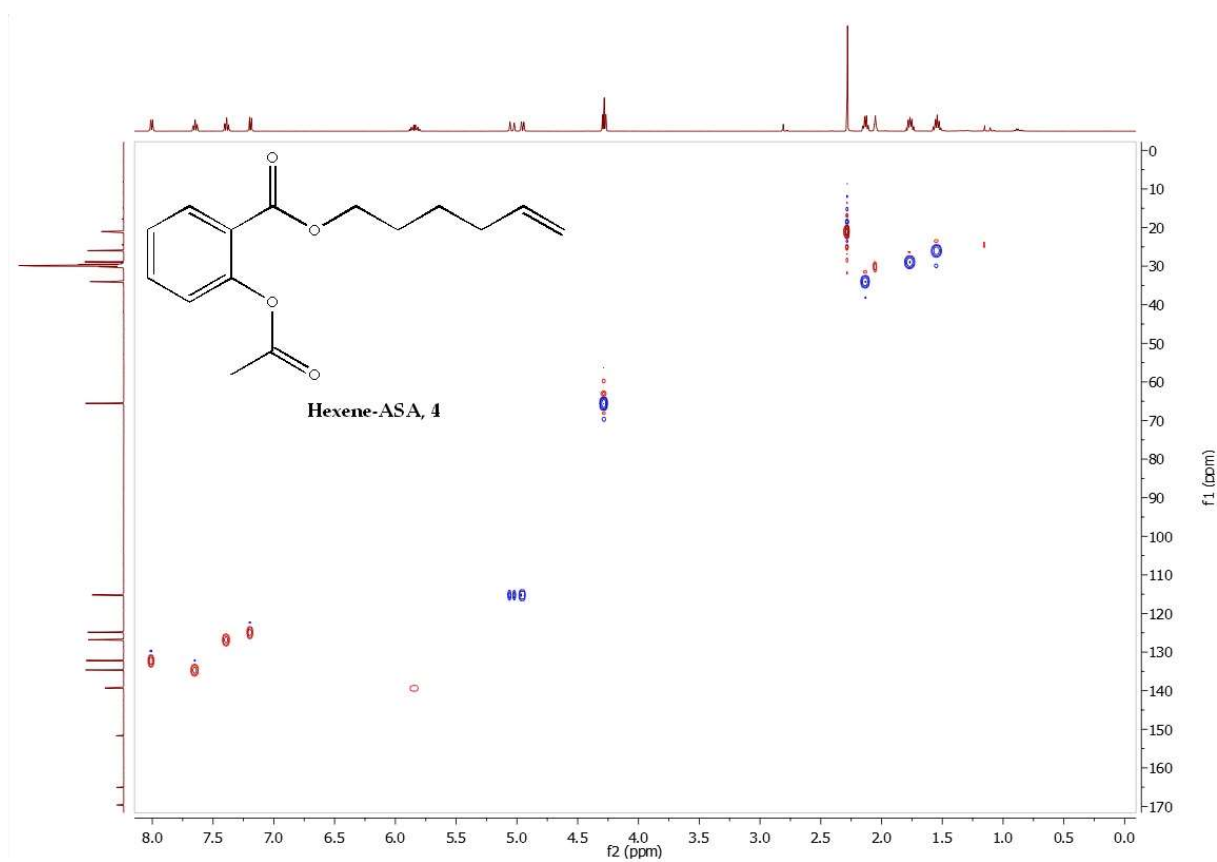

Figure S25.  $[^1\text{H}, ^{13}\text{C}]$ -HSQC of Hexene-ASA (4) in Acetone- $d_6$

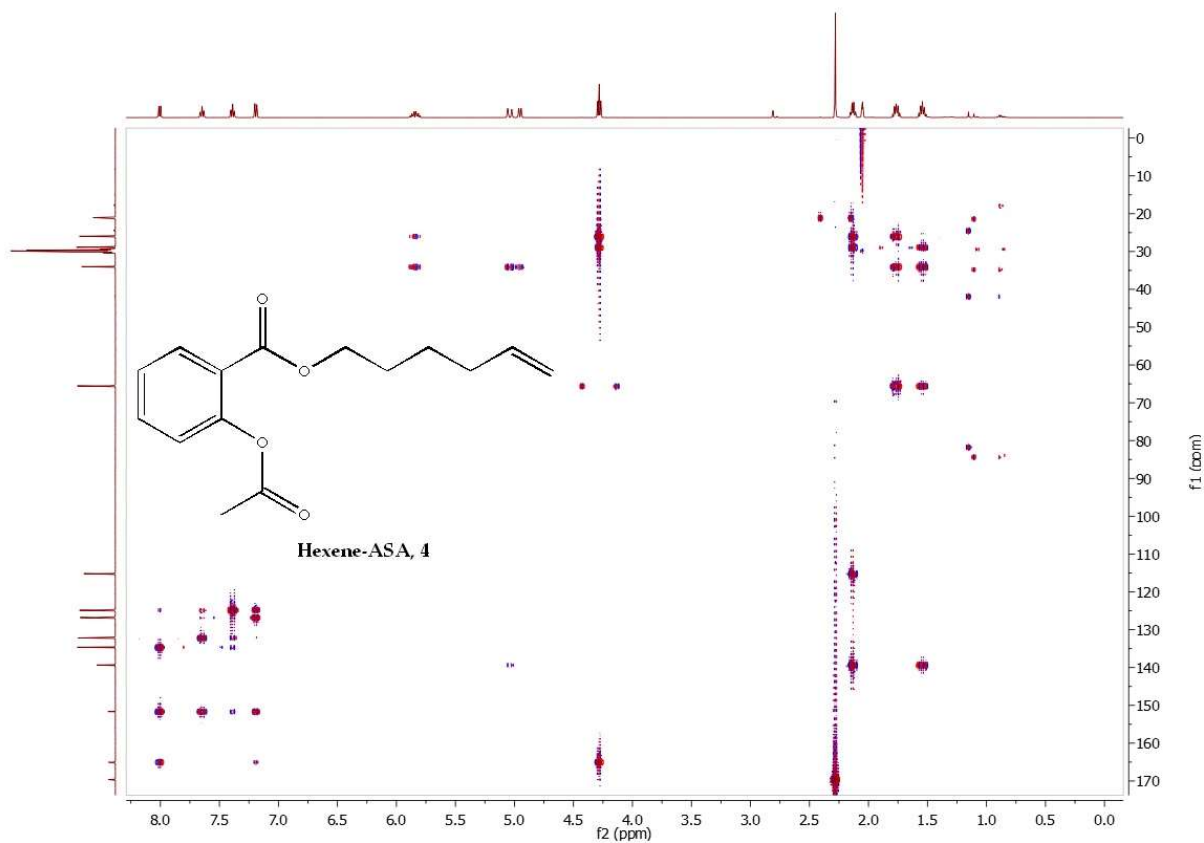

Figure S26.  $[^1\text{H},^{13}\text{C}]$ -HMBC of Hexene-ASA (4) in Acetone- $d_6$

### 2.8 Pt-Hexene-ASA (4a)

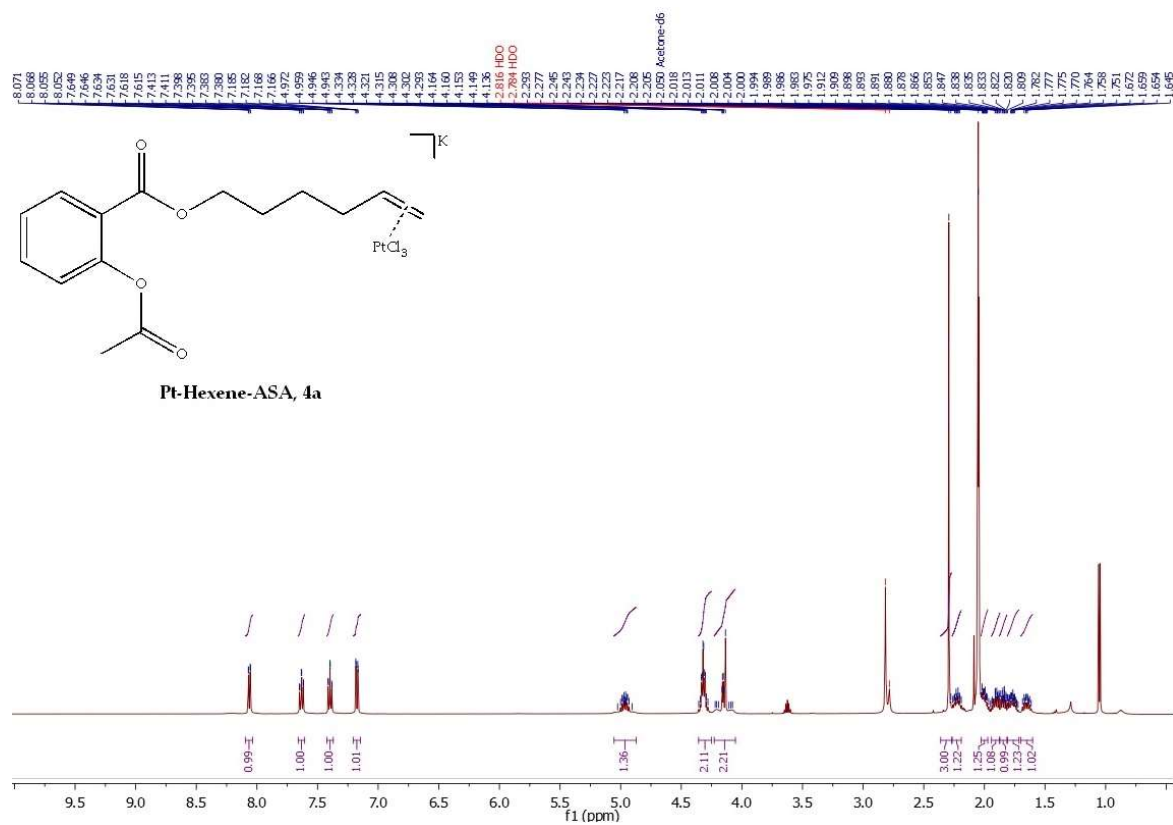

Figure S27.  $^1\text{H}$  NMR of Pt-Hexene-ASA (4a) in Acetone- $d_6$

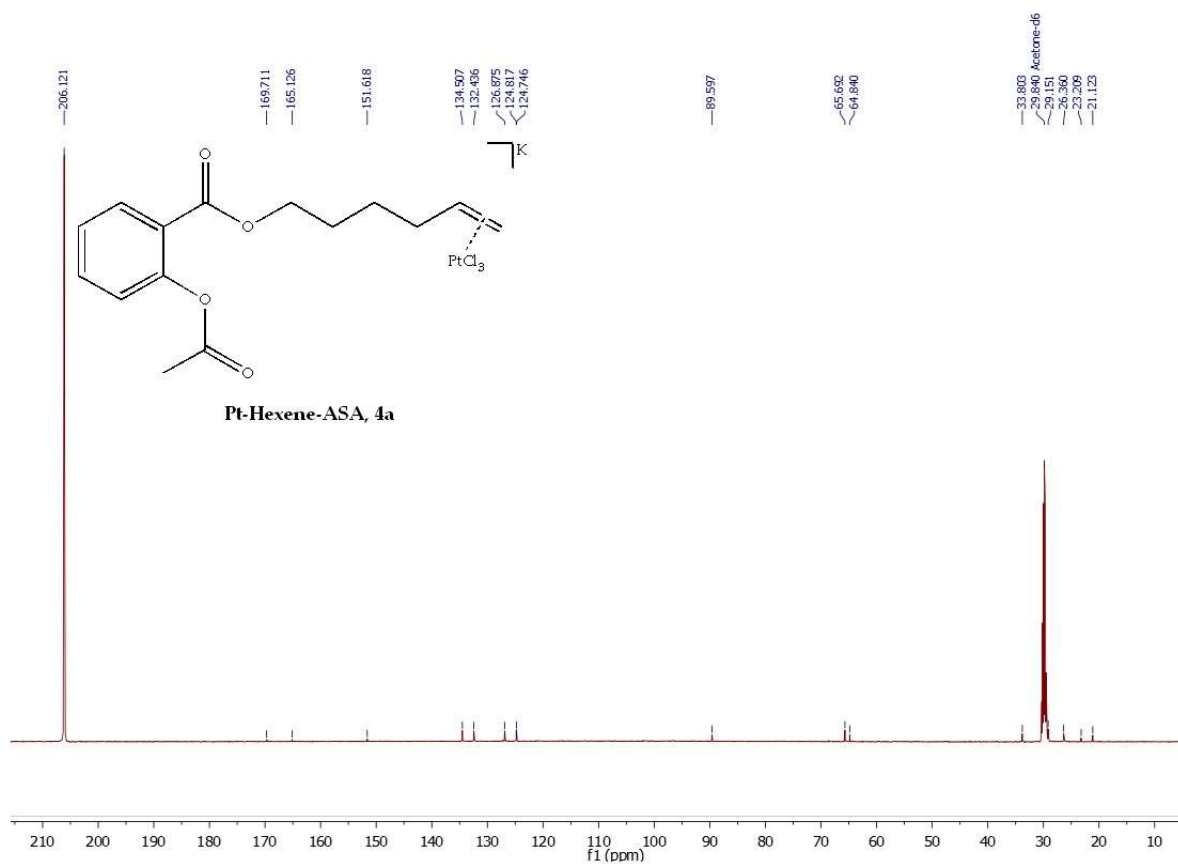

Figure S28.  $^{13}\text{C}$  NMR of Pt-Hexene-ASA (4a) in Acetone- $d_6$

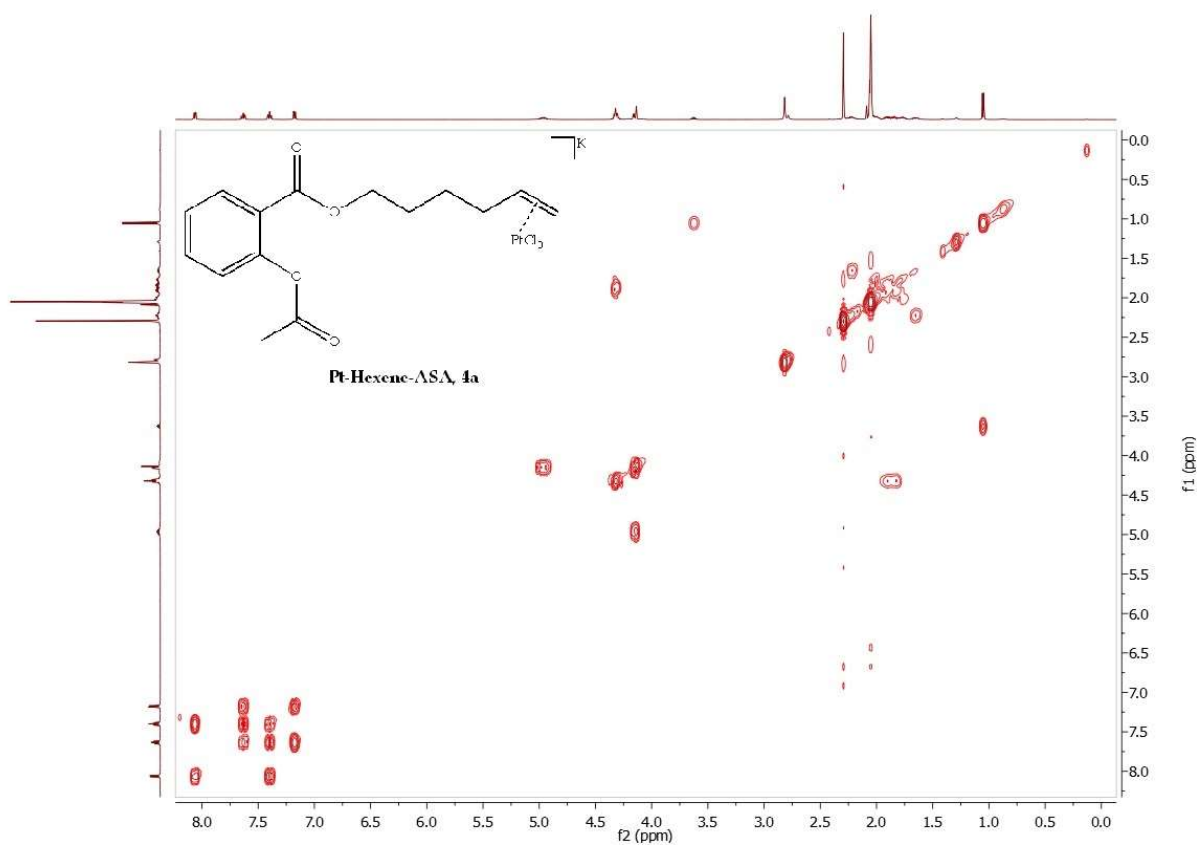

Figure S29.  $[^1\text{H}, ^1\text{H}]$ -COSY of Pt-Hexene-ASA (4a) in Acetone- $d_6$

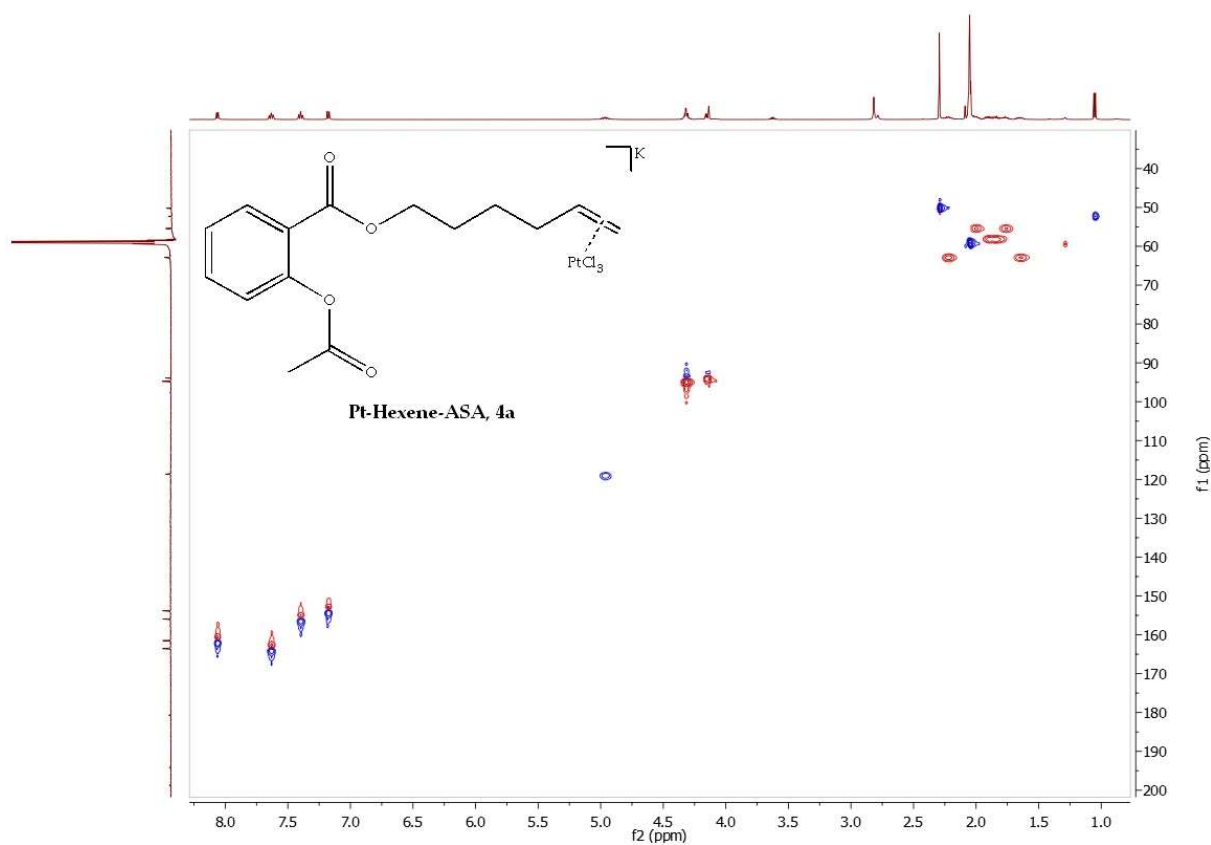

Figure S30.  $^1\text{H}$ ,  $^{13}\text{C}$ -HSQC of Pt-Hexene-ASA (**4a**) in Acetone- $d_6$

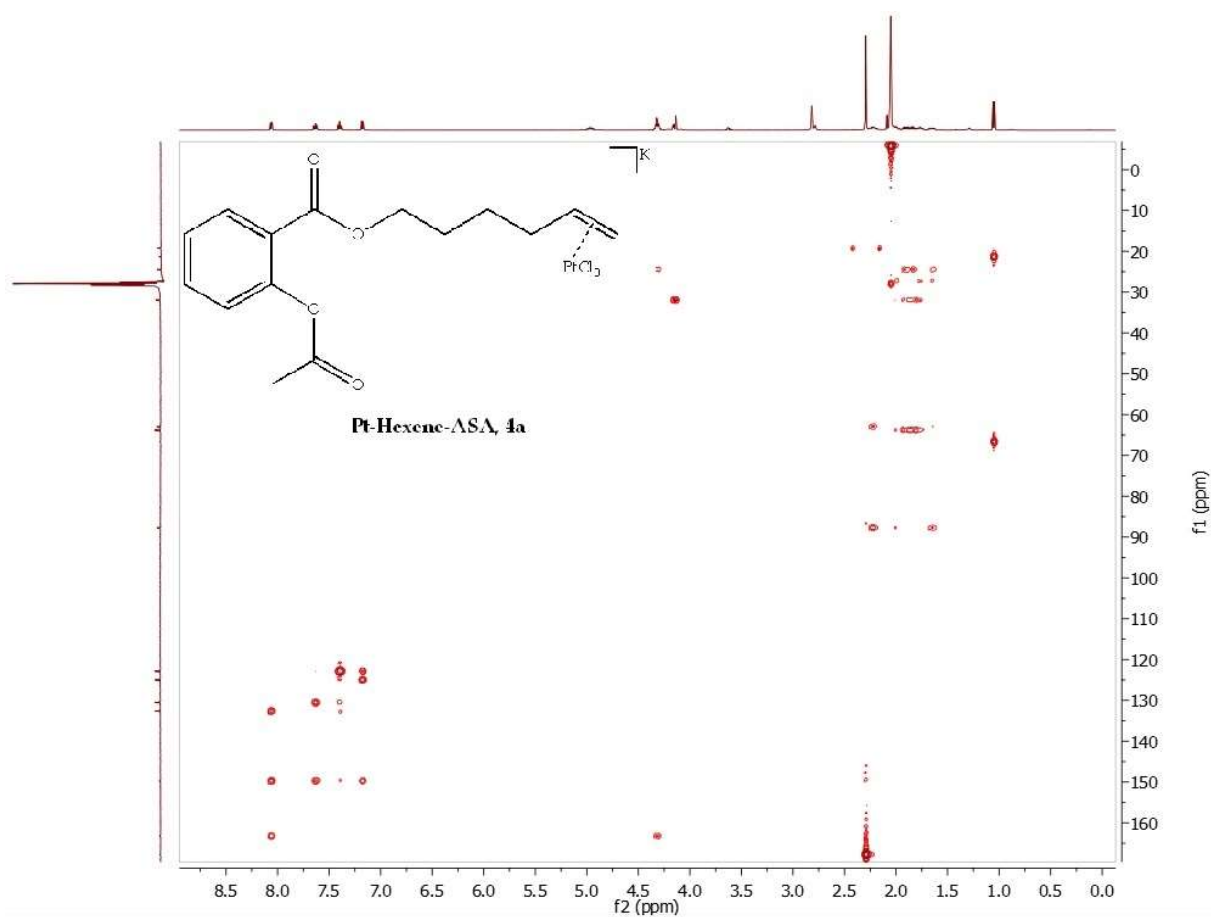

Figure S31.  $^1\text{H}$ ,  $^{13}\text{C}$ -HMBC of Pt-Hexene-ASA (**4a**) in Acetone- $d_6$



### 3. Crystal Data

Supplementary Table T1. Crystal Data and structure refinement for **1a**

|                                   |                                                                    |                             |
|-----------------------------------|--------------------------------------------------------------------|-----------------------------|
| Empirical formula                 | C <sub>16</sub> H <sub>22</sub> Cl <sub>3</sub> KO <sub>5</sub> Pt |                             |
| Formula weight                    | 634.87                                                             |                             |
| Temperature                       | 173(2) K                                                           |                             |
| Wavelength                        | 0.71073 Å                                                          |                             |
| Crystal system                    | Monoclinic                                                         |                             |
| Space group                       | P2 <sub>1</sub> /c (no. 14)                                        |                             |
| Unit cell dimensions              | a = 8.3367(3) Å                                                    | $\alpha = 90^\circ$         |
|                                   | b = 12.4677(5) Å                                                   | $\beta = 92.7060(10)^\circ$ |
|                                   | c = 20.8667(9) Å                                                   | $\gamma = 90^\circ$         |
| Volume                            | 2166.46(15) Å <sup>3</sup>                                         |                             |
| Z                                 | 4                                                                  |                             |
| Density (calculated)              | 1.946 Mg/m <sup>3</sup>                                            |                             |
| Absorption coefficient            | 7.061 mm <sup>-1</sup>                                             |                             |
| F(000)                            | 1224                                                               |                             |
| Crystal size                      | 0.220 x 0.110 x 0.070 mm <sup>3</sup>                              |                             |
| Theta range for data collection   | 2.446 to 25.997°                                                   |                             |
| Index ranges                      | -10<=h<=9, -15<=k<=15, -25<=l<=25                                  |                             |
| Reflections collected             | 53983                                                              |                             |
| Independent reflections           | 4266 [R(int) = 0.0473]                                             |                             |
| Completeness to theta = 25.242°   | 99.9%                                                              |                             |
| Absorption correction             | Semi-empirical from equivalents                                    |                             |
| Max. and min. transmission        | 0.862 and 0.598                                                    |                             |
| Refinement method                 | Full-matrix least-squares on F <sup>2</sup>                        |                             |
| Data / restraints / parameters    | 4266 / 3 / 248                                                     |                             |
| Goodness-of-fit on F <sup>2</sup> | 1.089                                                              |                             |
| Final R indices [I>2sigma(I)]     | R1 = 0.0186, wR2 = 0.0408                                          |                             |
| R indices (all data)              | R1 = 0.0234, wR2 = 0.0420                                          |                             |
| Extinction coefficient            | n/a                                                                |                             |
| Largest diff. peak and hole       | 0.946 and -1.446 e.Å <sup>-3</sup>                                 |                             |
